# Supplementary material
Source: ML conference proceedings conference paper supplement (https://openaccess.thecvf.com/content/CVPR2024/html/Mao_AdaRevD_Adaptive_Patch_CVPR_2024_paper.html)
Supplement: Supplementary file 1 [file Mao_AdaRevD_Adaptive_Patch_CVPR_2024_supplemental.pdf]

# AdaRevD: Adaptive Patch Exiting Reversible Decoder Pushes the Limit of Image Deblurring

## Supplementary Material

Table 1. Summary of four public datasets.

| Dataset        | Types      | Train | Test  |
|----------------|------------|-------|-------|
| GoPro [6]      | synthetic  | 2,103 | 1,111 |
| HIDE [8]       | synthetic  | -     | 2,025 |
| RealBlur-R [7] | real-world | 3,758 | 980   |
| RealBlur-J [7] | real-world | 3,758 | 980   |

Table 2. Confusion Matrix of the Classifier on GoPro testset.

| gt \ pred | ≤ 20 dB | ≤ 25 dB | ≤ 30 dB | ≤ 35 dB | ≤ 40 dB | > 40 dB | total |
|-----------|---------|---------|---------|---------|---------|---------|-------|
| ≤ 20 dB   | 394     | 61      | 0       | 0       | 0       | 0       | 455   |
| ≤ 25 dB   | 38      | 2998    | 164     | 0       | 0       | 0       | 3200  |
| ≤ 30 dB   | 0       | 141     | 3148    | 206     | 0       | 0       | 3495  |
| ≤ 35 dB   | 0       | 0       | 101     | 1248    | 154     | 0       | 1503  |
| ≤ 40 dB   | 0       | 0       | 0       | 22      | 192     | 3       | 217   |
| > 40 dB   | 0       | 0       | 0       | 0       | 13      | 5       | 18    |
| total     | 432     | 3200    | 3413    | 1476    | 359     | 8       | 8888  |

### 1. Details of Experiment

**Dataset** As shown in Sec. 4.1 in the main paper, we evaluate our method on the four datasets shown in Table 1 and report two groups of results:

- $\mathcal{A}$ . train on GoPro, test on GoPro [6] / HIDE [8] / RealBlur-R / RealBlur-J [7];
- $\mathcal{B}$ . train and test on RealBlur-J / RealBlur-R respectively;

**Dataset Distribution** Figs. 1 - 3 shows the distribution of the blur patches from different dataset. As indicated in Fig. 1 and Fig. 2, the degraded patches from GoPro, HIDE and RealBlur-J dataset are almost all fall within the range of [15 dB, 45 dB]. Thus, we group the patches to 6 degradation degrees: ( $\leq 20$  dB,  $\tilde{c} = 1$ ), ( $\leq 25$  dB,  $\tilde{c} = 2$ ), ( $\leq 30$  dB,  $\tilde{c} = 3$ ), ( $\leq 35$  dB,  $\tilde{c} = 4$ ), ( $\leq 40$  dB,  $\tilde{c} = 5$ ) and ( $> 40$  dB,  $\tilde{c} = 6$ ) for the classifier training. Different from other dataset, the degraded patches from RealBlur-R are almost all fall in the range of [15 dB, 55 dB] (shown in Fig. 3). Thus, we group the patches from RealBlur-R to 8 degradation degrees: ( $\leq 20$  dB,  $\tilde{c} = 1$ ), ( $\leq 25$  dB,  $\tilde{c} = 2$ ), ( $\leq 30$  dB,  $\tilde{c} = 3$ ), ( $\leq 35$  dB,  $\tilde{c} = 4$ ), ( $\leq 40$  dB,  $\tilde{c} = 5$ ), ( $\leq 45$  dB,  $\tilde{c} = 6$ ), ( $\leq 50$  dB,  $\tilde{c} = 7$ ) and ( $> 50$  dB,  $\tilde{c} = 8$ ) for the classifier training.

**Clustering Criteria** We split the image patches into different classes according to PSNR, which is a direct and efficient measure of degradation degree. We conduct

experiments: ① In paper, we apply a step ( $\gamma$ ) of 5 dB to cluster the blur patches into 6 degradation degrees from 15 dB to 45 dB. Here we change  $\gamma$  within the range of [3, 4, 5, 6, 10], and obtain almost the same PSNRs (34.50 dB). Classification accuracies and utilization rates of the sub-decoders (D-rates) are (83.7%, 87.2%), (87.0%, 86.0%), (89.8%, 84.3%), (91.4%, 87.7%), and (94.6%, 84.8%) respectively. First, although the larger step acquires better classification accuracy, AdaRevD-B (4 sub-decoders) has a big tolerance for accuracy corresponding to a small  $\gamma$  (e.g., 9 classes when  $\gamma = 3$ ). Second, it is observed that almost all the misclassified patches are classified to the adjacent degradation degree, shown in Table 2 ( $\gamma = 5$ ). Only a few patches would exit at earlier sub-decoder (slightly reduce PSNR of the whole image), while a few exit at later sub-decoder (slightly increase PSNR), which have certain complementary effects on the final PSNR. ② Following ClassSR [4], we separate PSNRs into 6 classes with the **same numbers** of blur patches, the PSNR is also the same (34.50 dB), even with lower classification accuracy (85.1%). Thus, AdaRevD does not demand a very high classification accuracy, and it is acceptable that a small number of patches are classified to adjacent degradation degree.

**Evaluation Metric** The computational complexity of MACs (G) and the number of parameters (M) are reported in Table 3. Table 3 illustrates that our method can further explore the well-trained NAFNet’s [1] insufficient decoding capability (33.69 dB) to a higher level (34.10 dB), which is similar to UFPNet [3] (34.06 dB 243 G), but with fewer MACs (168 G).

**Early-exit Signal** In AdaRevD, early-exit signal  $E_c$  is determined by  $\mathbf{O}_c^j$  and  $\tau$ . The  $\mathbf{O}_c^j$  of RevD-B on GoPro, RealBlur-J and RealBlur-R datasets are summarized in Tables 4, 5 and 6. Furthermore, the  $\mathbf{O}_c^j$  of RevD-L on these three datasets are shown in Tables 7, 8 and 9. The first  $\mathbf{O}_c^{j-1}$  where its next  $\mathbf{O}_c^j$  is smaller than  $\tau = 0.05$  (the patch exit in the  $((j - 1)$ th sub-decoder) is highlighted in the tables.

As illustrated in these tables, blur patches with varying degradation degrees exhibit distinct improvements in PSNR within the same sub-decoder. The higher the PSNR, the less restoration the patch undergoes in the identical sub-decoder. As more sub-decoders are progressively stacked,

Table 3. The comparison involves the computational complexity of MACs (G) and the number of parameters (M), when the input size is  $256 \times 256$ . PSNR (dB) is calculated on GoPro test set.

| Method     | MIMO-UNet++ [2] | DeepRFT+ [5] | Restormer [10] | NAFNet64 [1] | UFPNet [3] | RevD-B(NAFNet) | RevD-B(UFPNet) | RevD-L(UFPNet) |
|------------|-----------------|--------------|----------------|--------------|------------|----------------|----------------|----------------|
| MACs (G)   | 617             | 187          | 141            | 64           | 243        | 168            | 347            | 460            |
| Params (M) | 16.1            | 19.5         | 26.1           | 65.0         | 80.3       | 131.0          | 142.5          | 210.8          |
| PSNR (dB)  | 32.68           | 33.52        | 32.92          | 33.69        | 34.06      | 34.10          | 34.51          | 34.64          |

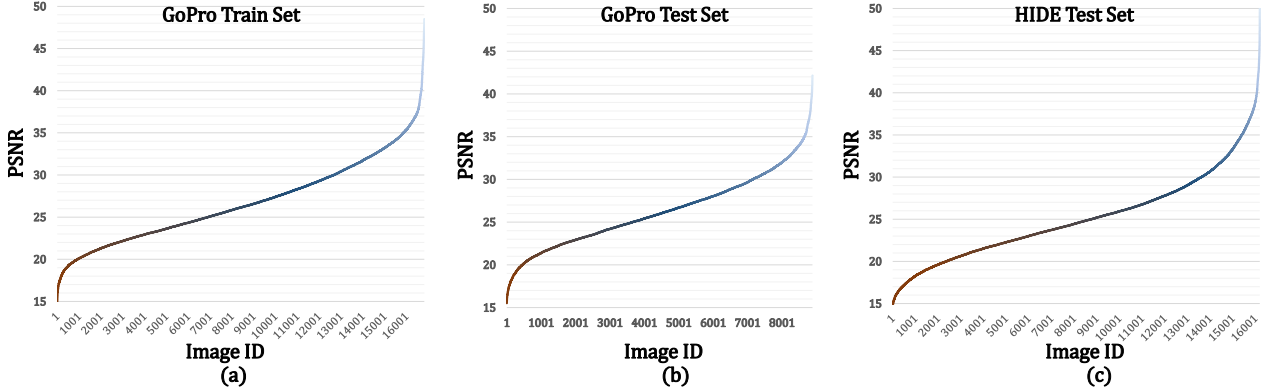

Figure 1. Distribution of GoPro [6] and HIDE [8] Dataset. (a) The ranked PSNR curve of the image patches from GoPro train set; (b) The ranked PSNR curve of the image patches from GoPro test set; (c) The ranked PSNR curve of the image patches from HIDE test set.

Table 4. Improvement of different sub-decoders in RevD-B on GoPro dataset. The value in the  $c$ th row and the  $j$ th column is  $O_c^j$ . The first  $O_c^{j-1}$  that  $O_c^j$  smaller than  $\tau = 0.05$  is highlighted in the table.

| Degree    | TrainSet |       |       |       | TestSet |       |       |       |
|-----------|----------|-------|-------|-------|---------|-------|-------|-------|
|           | dec1     | dec2  | dec3  | dec4  | dec1    | dec2  | dec3  | dec4  |
| $\leq 20$ | 11.134   | 0.642 | 0.351 | 0.178 | 10.275  | 0.653 | 0.383 | 0.170 |
| 20-25     | 10.959   | 0.406 | 0.211 | 0.100 | 9.622   | 0.355 | 0.208 | 0.093 |
| 25-30     | 9.184    | 0.214 | 0.105 | 0.047 | 8.097   | 0.191 | 0.100 | 0.045 |
| 30-35     | 6.215    | 0.121 | 0.050 | 0.021 | 5.397   | 0.103 | 0.050 | 0.021 |
| 35-40     | 3.468    | 0.079 | 0.024 | 0.011 | 2.859   | 0.073 | 0.014 | 0.010 |
| $> 40$    | 2.380    | 0.047 | 0.016 | 0.009 | 1.510   | 0.022 | 0.006 | 0.004 |

the model’s capacity to recover images reaches saturation. Tables 4 and 7 demonstrate that the  $E_c$  remains consistent between the training set and test set when  $\tau = 0.05$ . Moreover, the performance of the various sub-decoders on the train and test set in the tables indicate that selecting the early-exit signal  $E_c$  based on the train set ensures effective recovery of patches from the test set. In essence, opting for  $E_c$  from the train set is rational, as the sub-decoder saturation observed in the train set aligns with the saturation observed in the test set.

Table 5. Improvement of different sub-decoders in RevD-B on RealBlur-J dataset.

| Degree    | TrainSet |       |       |       | TestSet |        |       |       |
|-----------|----------|-------|-------|-------|---------|--------|-------|-------|
|           | dec1     | dec2  | dec3  | dec4  | dec1    | dec2   | dec3  | dec4  |
| $\leq 20$ | 11.855   | 0.758 | 0.441 | 0.201 | 5.223   | 0.093  | 0.089 | 0.041 |
| 20-25     | 11.236   | 0.563 | 0.336 | 0.139 | 4.842   | 0.138  | 0.092 | 0.041 |
| 25-30     | 10.041   | 0.390 | 0.214 | 0.080 | 4.138   | 0.107  | 0.066 | 0.024 |
| 30-35     | 8.406    | 0.249 | 0.115 | 0.042 | 3.461   | 0.067  | 0.036 | 0.010 |
| 35-40     | 7.101    | 0.168 | 0.064 | 0.030 | 2.537   | 0.073  | 0.034 | 0.007 |
| $> 40$    | 5.525    | 0.126 | 0.044 | 0.028 | 1.380   | -0.030 | 0.000 | 0.000 |

## 2. Visualizations

The visual results for GoPro [6], HIDE [8], RealBlur-R [7] and RealBlur-J [7] are presented in Figs. 4, 5, 6 and 7, respectively. The visualizations depicted in Fig. 4 and Fig. 5 illustrate AdaRevD’s capability to restore sharper images. We also show the visualization results on the RealBlur [7] dataset in Fig. 6 and Fig. 7. It can be observed that our model yields more visually pleasant outputs than other methods on both synthetic and real-world motion deblurring. This is evident when compared to other SOTA methods, such as DeepRFT [5] and UFPNet [3].

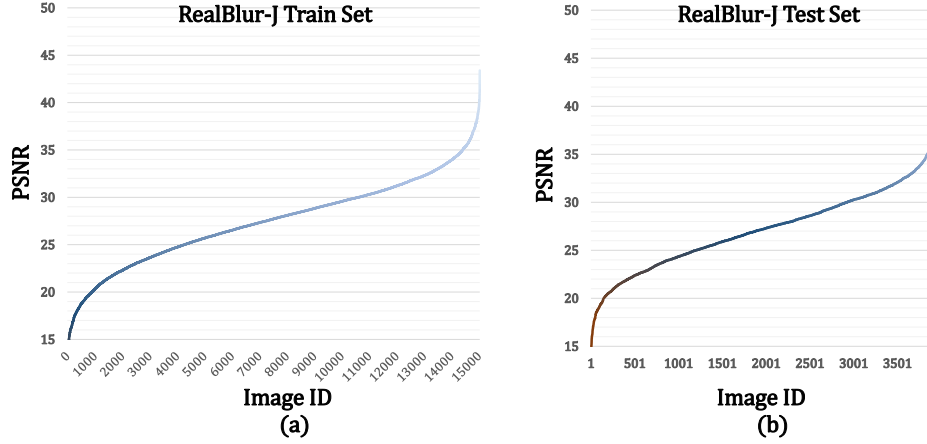

Figure 2. Distribution of RealBlur-J [7] Dataset. (a) The ranked PSNR curve of the image patches from RealBlur-J train set; (b) The ranked PSNR curve of the image patches from RealBlur-J test set.

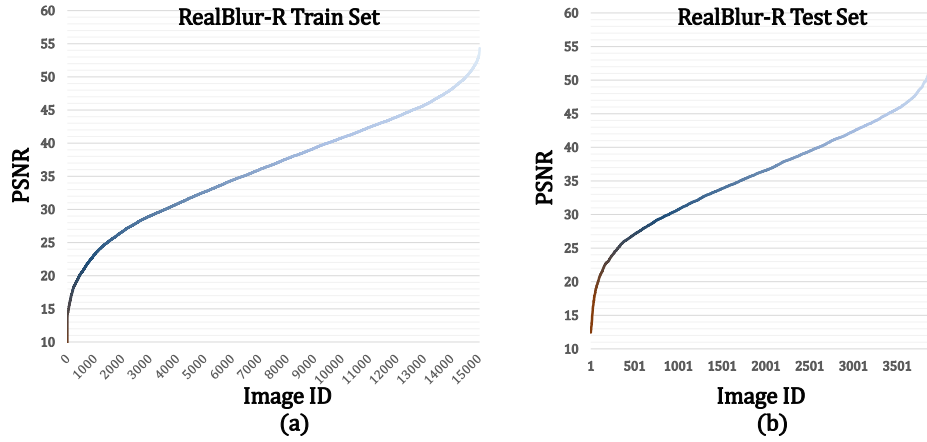

Figure 3. Distribution of RealBlur-R [7] Dataset. (a) The ranked PSNR curve of the image patches from RealBlur-R train set; (b) The ranked PSNR curve of the image patches from RealBlur-R test set.

Table 6. Improvement of different sub-decoders in RevD-B on RealBlur-R dataset.

| Degree | TrainSet |       |        |        | TestSet |       |       |       |
|--------|----------|-------|--------|--------|---------|-------|-------|-------|
|        | dec1     | dec2  | dec3   | dec4   | dec1    | dec2  | dec3  | dec4  |
| ≤20    | 12.401   | 0.863 | 0.308  | 0.098  | 5.541   | 0.152 | 0.063 | 0.029 |
| 20-25  | 12.356   | 0.781 | 0.272  | 0.081  | 5.305   | 0.182 | 0.061 | 0.022 |
| 25-30  | 12.268   | 0.702 | 0.215  | 0.060  | 5.657   | 0.155 | 0.056 | 0.017 |
| 30-35  | 11.593   | 0.588 | 0.178  | 0.0513 | 4.233   | 0.139 | 0.039 | 0.012 |
| 35-40  | 9.681    | 0.390 | 0.115  | 0.042  | 3.431   | 0.133 | 0.037 | 0.016 |
| 40-45  | 7.423    | 0.245 | 0.0778 | 0.032  | 3.043   | 0.111 | 0.028 | 0.012 |
| 45-50  | 5.210    | 0.136 | 0.042  | 0.021  | 2.005   | 0.042 | 0.012 | 0.008 |
| >50    | 3.227    | 0.074 | 0.018  | 0.009  | 1.102   | 0.014 | 0.006 | 0.006 |

Table 7. Improvement of different sub-decoders in RevD-L on GoPro dataset.

| Degree | TrainSet |       |       |       |       |       |       |       | TestSet |       |       |       |       |       |       |       |
|--------|----------|-------|-------|-------|-------|-------|-------|-------|---------|-------|-------|-------|-------|-------|-------|-------|
|        | dec1     | dec2  | dec3  | dec4  | dec5  | dec6  | dec7  | dec8  | dec1    | dec2  | dec3  | dec4  | dec5  | dec6  | dec7  | dec8  |
| ≤20    | 11.068   | 0.601 | 0.257 | 0.222 | 0.198 | 0.109 | 0.047 | 0.014 | 10.201  | 0.610 | 0.252 | 0.269 | 0.198 | 0.107 | 0.048 | 0.015 |
| 20-25  | 10.903   | 0.400 | 0.154 | 0.135 | 0.118 | 0.064 | 0.026 | 0.007 | 9.569   | 0.345 | 0.129 | 0.153 | 0.122 | 0.055 | 0.021 | 0.007 |
| 25-30  | 9.141    | 0.227 | 0.076 | 0.070 | 0.060 | 0.031 | 0.012 | 0.003 | 8.053   | 0.206 | 0.065 | 0.073 | 0.064 | 0.030 | 0.009 | 0.003 |
| 30-35  | 6.176    | 0.145 | 0.037 | 0.035 | 0.029 | 0.015 | 0.007 | 0.002 | 5.362   | 0.125 | 0.030 | 0.041 | 0.031 | 0.015 | 0.005 | 0.002 |
| 35-40  | 3.437    | 0.101 | 0.019 | 0.018 | 0.014 | 0.007 | 0.004 | 0.001 | 2.798   | 0.116 | 0.012 | 0.023 | 0.016 | 0.010 | 0.003 | 0.001 |
| >40    | 2.365    | 0.057 | 0.016 | 0.010 | 0.007 | 0.007 | 0.008 | 0.002 | 1.470   | 0.067 | 0.013 | 0.018 | 0.014 | 0.006 | 0.003 | 0.001 |

Table 8. Improvement of different sub-decoders in RevD-L on RealBlur-J dataset.

| Degree | TrainSet |       |       |       |       |        |       |       | TestSet |        |        |       |        |       |       |        |
|--------|----------|-------|-------|-------|-------|--------|-------|-------|---------|--------|--------|-------|--------|-------|-------|--------|
|        | dec1     | dec2  | dec3  | dec4  | dec5  | dec6   | dec7  | dec8  | dec1    | dec2   | dec3   | dec4  | dec5   | dec6  | dec7  | dec8   |
| ≤20    | 11.718   | 0.788 | 0.429 | 0.227 | 0.221 | 0.131  | 0.101 | 0.006 | 5.131   | 0.074  | 0.065  | 0.052 | 0.056  | 0.032 | 0.022 | 0.002  |
| 20-25  | 11.113   | 0.606 | 0.330 | 0.190 | 0.161 | 0.082  | 0.066 | 0.004 | 4.813   | 0.125  | 0.092  | 0.050 | 0.056  | 0.033 | 0.024 | 0.002  |
| 25-30  | 9.956    | 0.419 | 0.218 | 0.133 | 0.096 | 0.045  | 0.039 | 0.003 | 4.119   | 0.089  | 0.067  | 0.045 | 0.037  | 0.019 | 0.014 | 0.001  |
| 30-35  | 8.348    | 0.263 | 0.129 | 0.082 | 0.050 | 0.022  | 0.025 | 0.002 | 3.486   | 0.066  | 0.038  | 0.028 | 0.021  | 0.009 | 0.010 | 0.001  |
| 35-40  | 7.040    | 0.186 | 0.091 | 0.048 | 0.029 | 0.0159 | 0.019 | 0.002 | 2.444   | 0.052  | 0.050  | 0.032 | 0.013  | 0.004 | 0.006 | 0.000  |
| >40    | 5.444    | 0.158 | 0.081 | 0.039 | 0.022 | 0.014  | 0.018 | 0.001 | 1.462   | -0.021 | -0.018 | 0.026 | -0.021 | 0.007 | 0.003 | -0.003 |

Table 9. Improvement of different sub-decoders in RevD-L on RealBlur-R dataset.

| Degree | TrainSet |       |       |       |       |       |       |       | TestSet |        |       |       |       |       |       |       |
|--------|----------|-------|-------|-------|-------|-------|-------|-------|---------|--------|-------|-------|-------|-------|-------|-------|
|        | dec1     | dec2  | dec3  | dec4  | dec5  | dec6  | dec7  | dec8  | dec1    | dec2   | dec3  | dec4  | dec5  | dec6  | dec7  | dec8  |
| ≤20    | 12.037   | 1.174 | 0.357 | 0.105 | 0.188 | 0.117 | 0.029 | 0.000 | 5.524   | 0.178  | 0.062 | 0.033 | 0.062 | 0.032 | 0.010 | 0.000 |
| 20-25  | 11.988   | 1.102 | 0.314 | 0.098 | 0.174 | 0.098 | 0.024 | 0.000 | 5.252   | 0.227  | 0.062 | 0.037 | 0.064 | 0.023 | 0.007 | 0.000 |
| 25-30  | 11.895   | 1.030 | 0.259 | 0.079 | 0.132 | 0.070 | 0.019 | 0.000 | 5.611   | 0.214  | 0.062 | 0.036 | 0.046 | 0.021 | 0.006 | 0.000 |
| 30-35  | 11.260   | 0.891 | 0.215 | 0.060 | 0.094 | 0.055 | 0.017 | 0.000 | 4.190   | 0.190  | 0.041 | 0.023 | 0.032 | 0.016 | 0.005 | 0.000 |
| 35-40  | 9.419    | 0.640 | 0.136 | 0.035 | 0.055 | 0.038 | 0.013 | 0.000 | 3.372   | 0.189  | 0.037 | 0.019 | 0.026 | 0.017 | 0.006 | 0.000 |
| 40-45  | 7.243    | 0.424 | 0.085 | 0.022 | 0.030 | 0.027 | 0.009 | 0.000 | 3.016   | 0.141  | 0.031 | 0.016 | 0.018 | 0.016 | 0.004 | 0.000 |
| 45-50  | 5.093    | 0.259 | 0.044 | 0.013 | 0.014 | 0.015 | 0.005 | 0.000 | 1.991   | 0.058  | 0.020 | 0.007 | 0.006 | 0.008 | 0.003 | 0.000 |
| >50    | 3.139    | 0.183 | 0.020 | 0.008 | 0.006 | 0.007 | 0.003 | 0.000 | 1.128   | -0.014 | 0.010 | 0.007 | 0.003 | 0.008 | 0.002 | 0.000 |

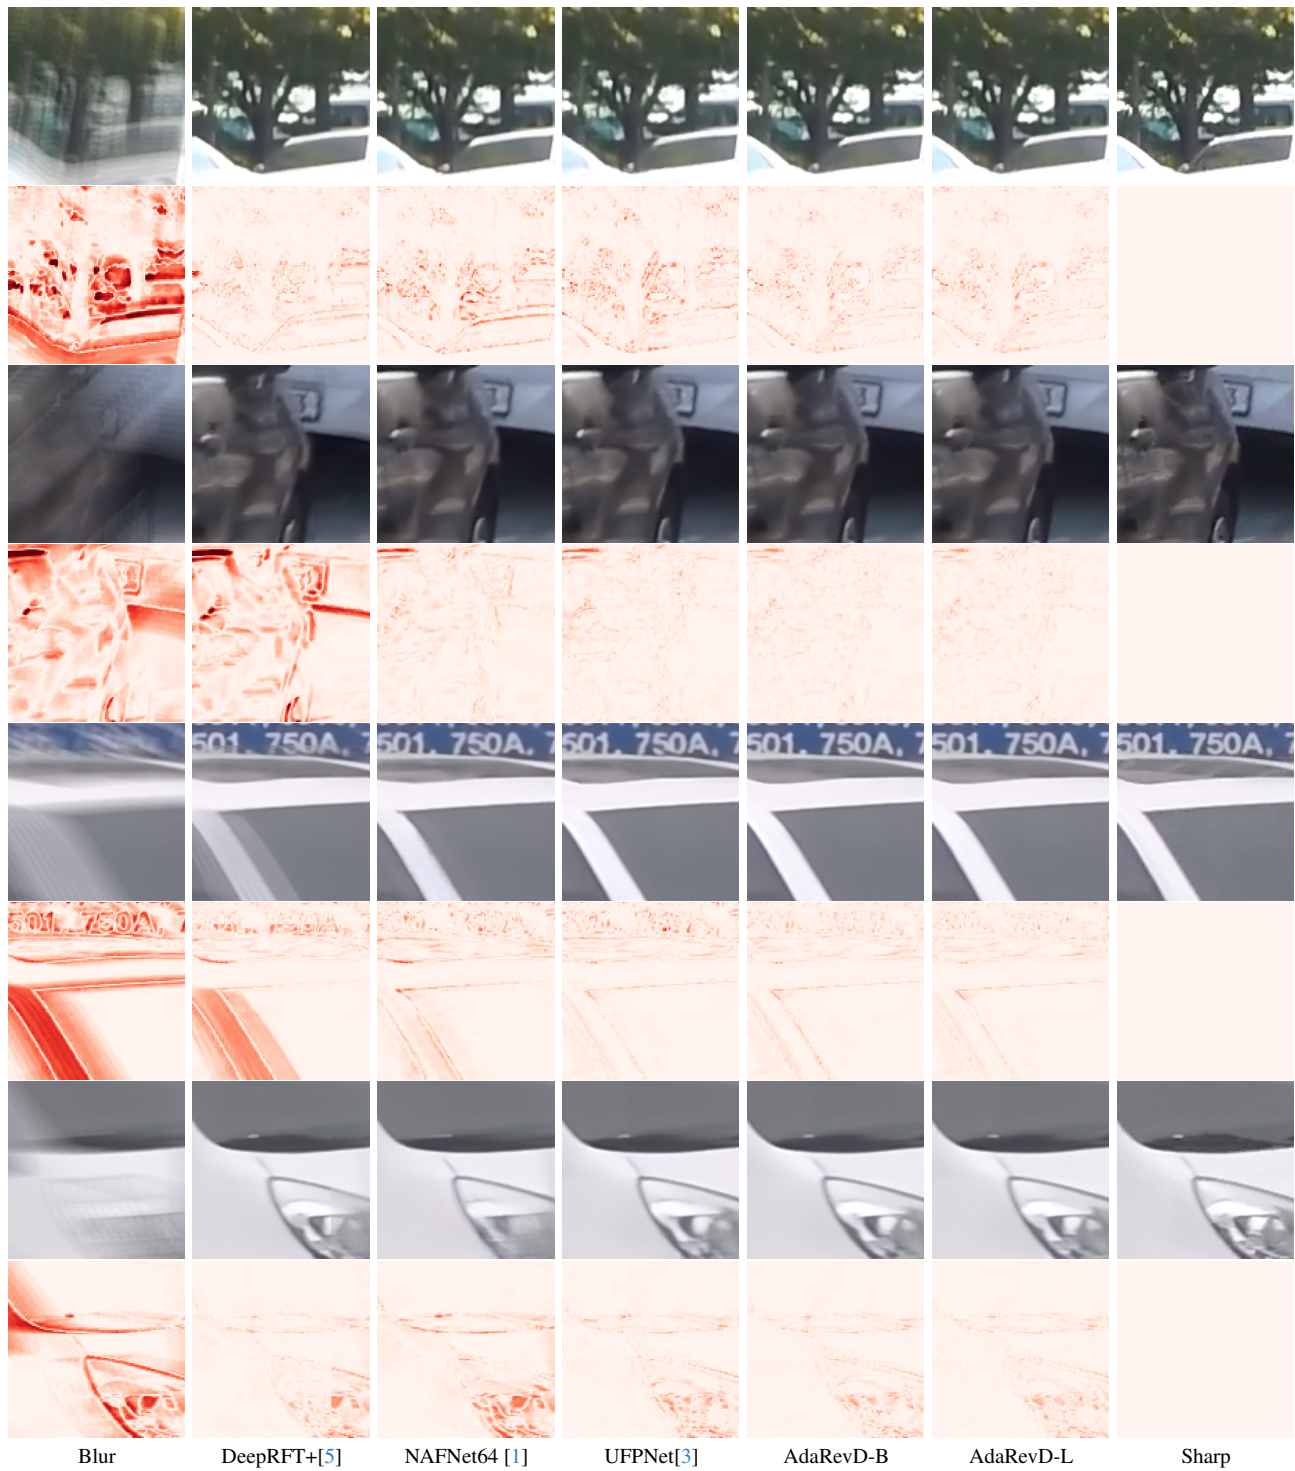

Figure 4. Examples on the GoPro test dataset. The odd rows show blur image, predicted images of different methods, and ground-truth sharp image. The even rows show the residual of the blur image / predicted sharp images and the ground-truth sharp image.

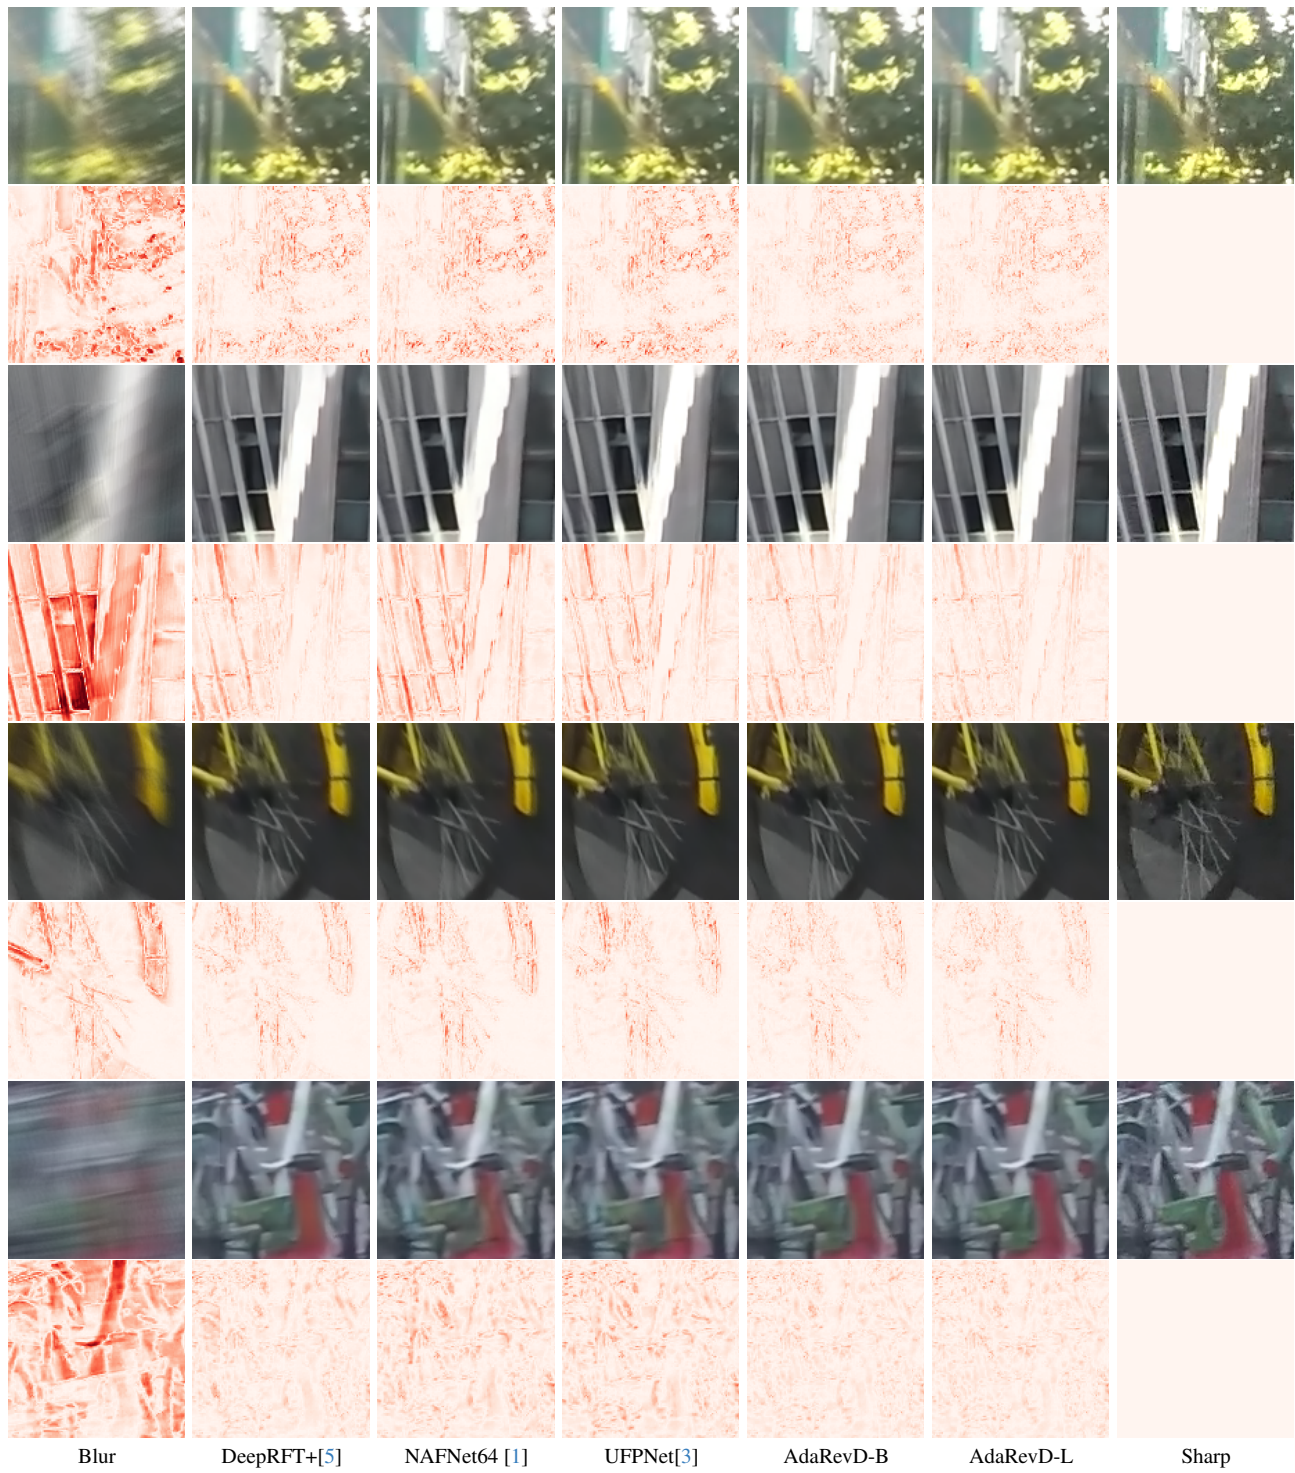

Figure 5. Examples on the HIDE test dataset.

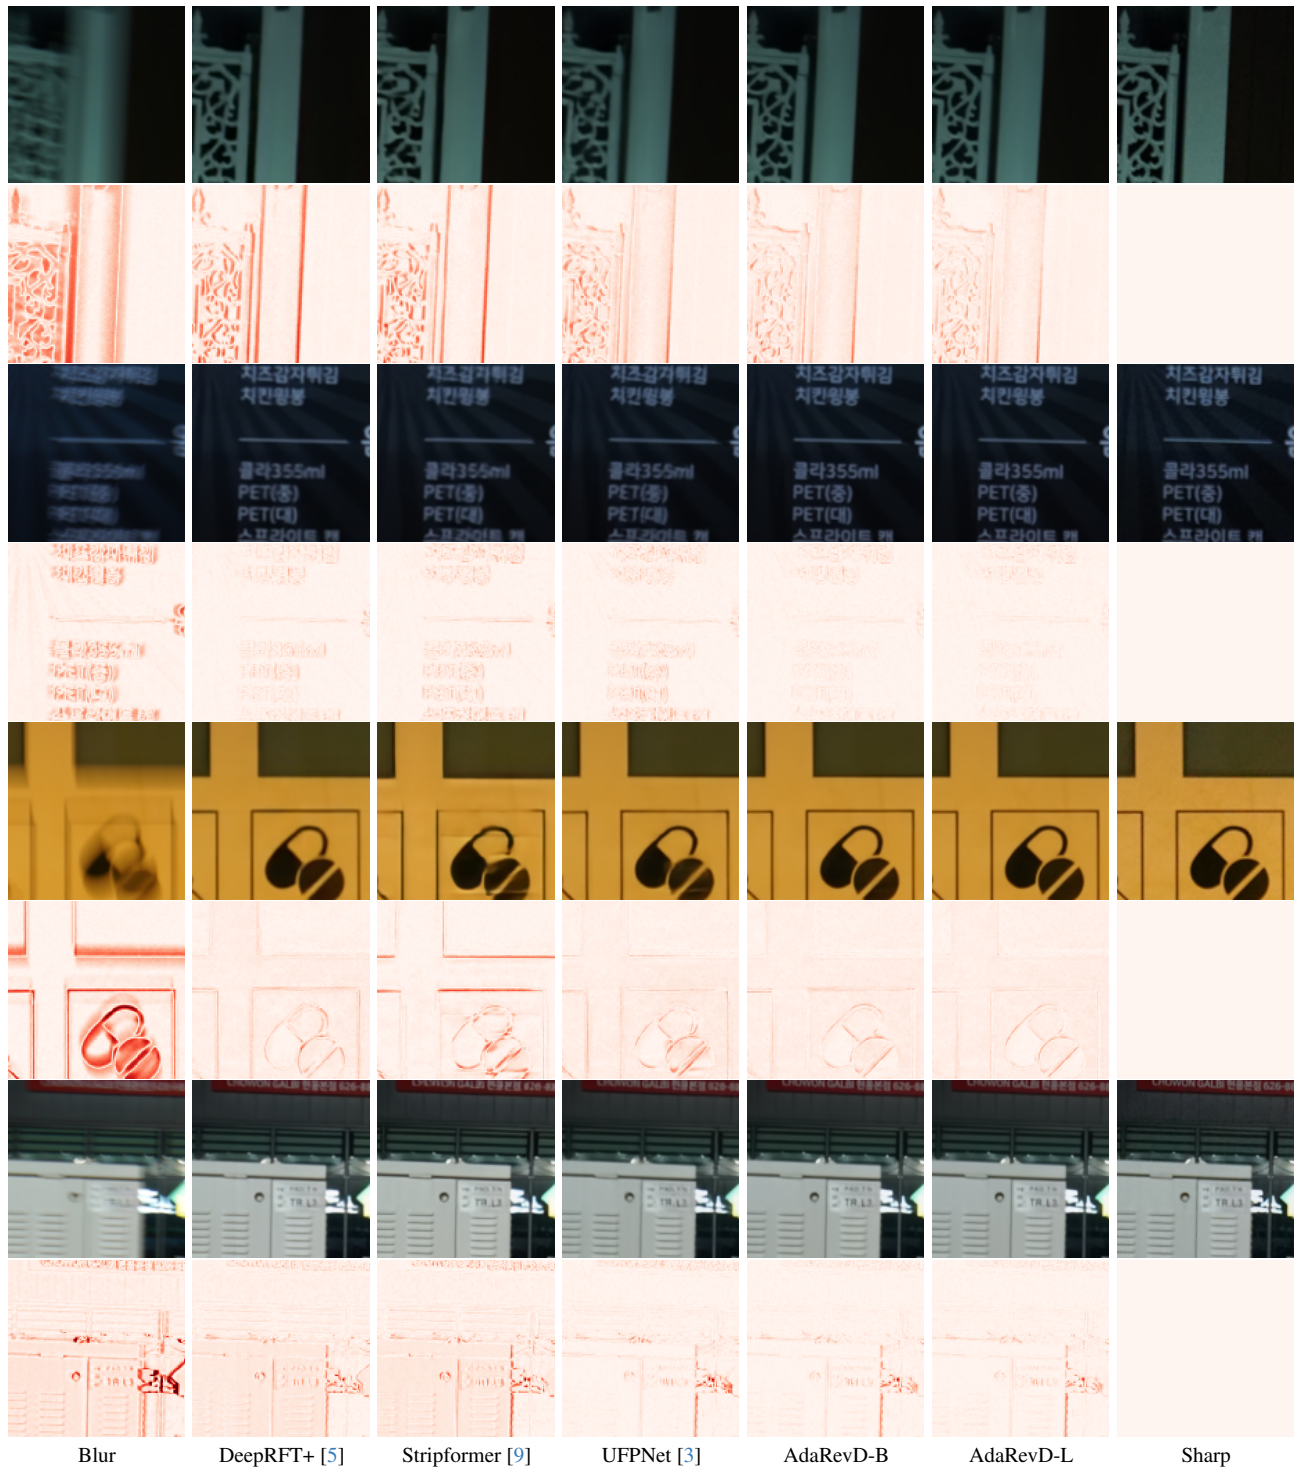

Figure 6. Examples on the RealBlur-J test dataset.

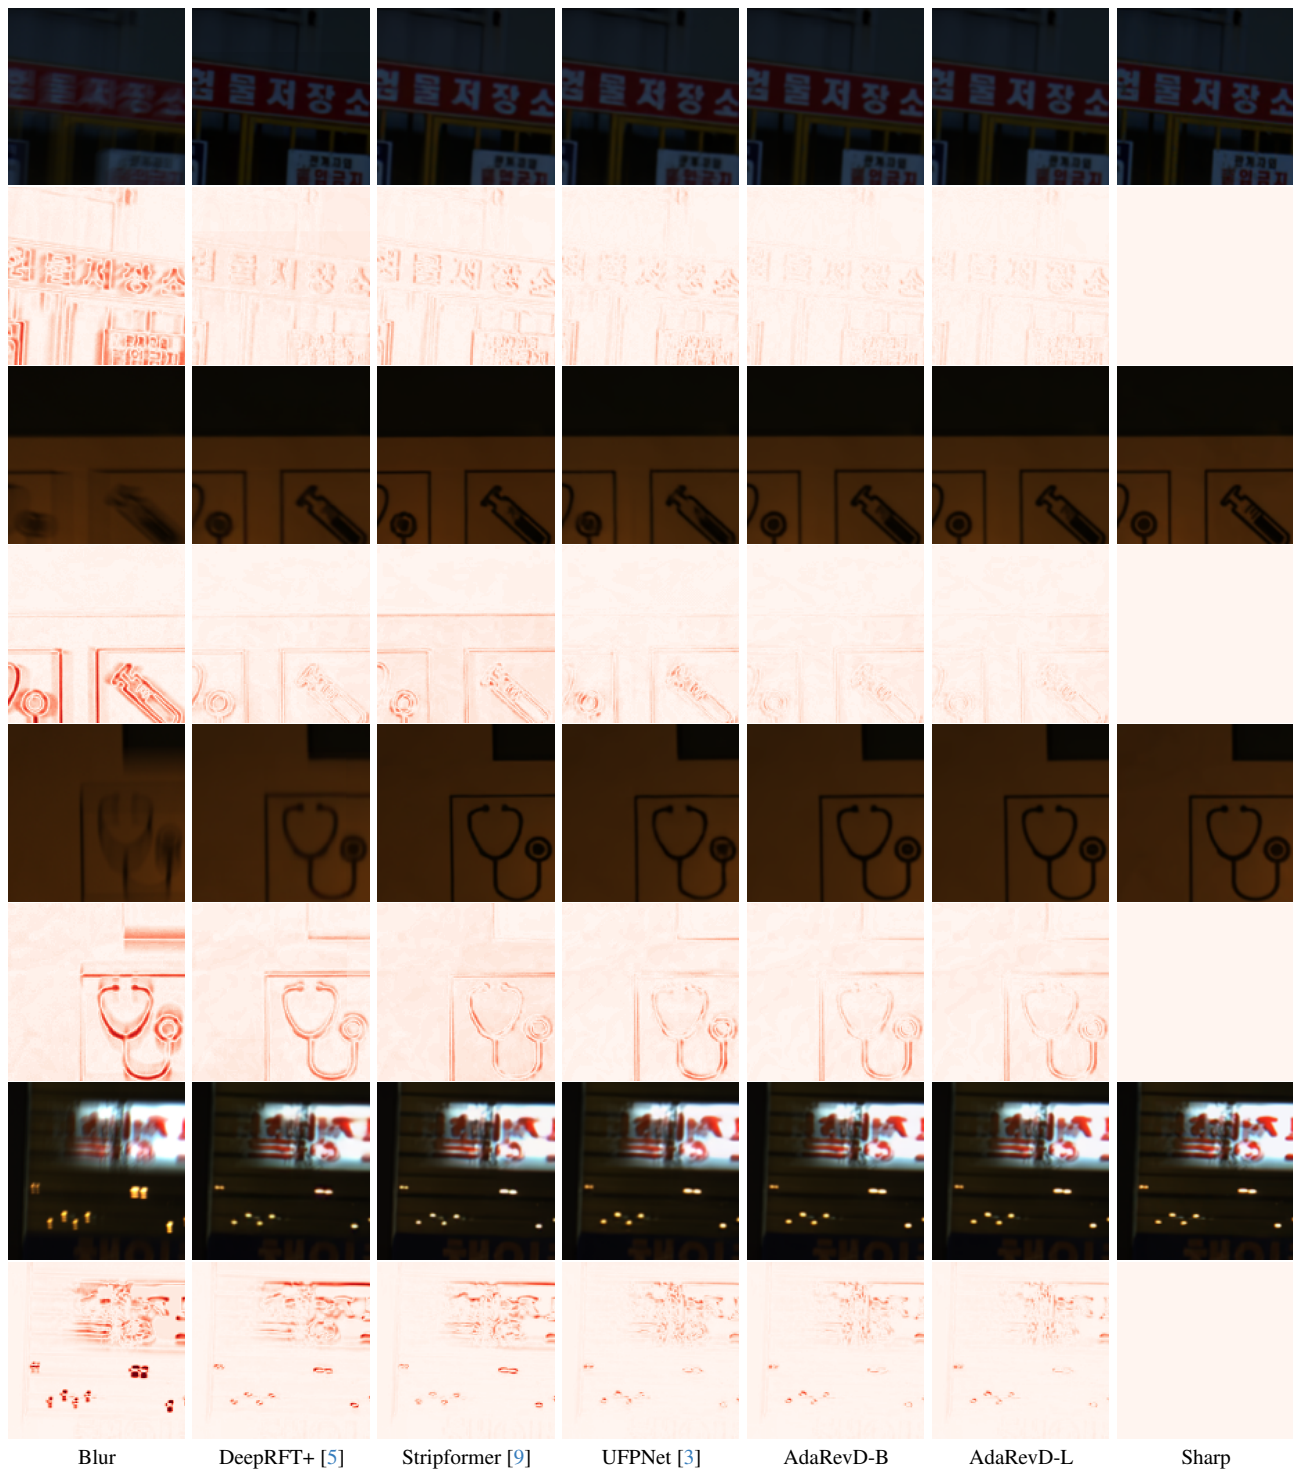

Figure 7. Examples on the RealBlur-R test dataset.



## References

- [1] Liangyu Chen, Xiaojie Chu, Xiangyu Zhang, and Jian Sun. Simple baselines for image restoration. In *Proc. ECCV*, 2022. 1, 2, 5, 6
- [2] Sung-Jin Cho, Seo-Won Ji, Jun-Pyo Hong, Seung-Won Jung, and Sung-Jea Ko. Rethinking coarse-to-fine approach in single image deblurring. In *Proc. ICCV*, 2021. 2
- [3] Zhenxuan Fang, Fangfang Wu, Weisheng Dong, Xin Li, Jinjian Wu, and Guangming Shi. Self-supervised non-uniform kernel estimation with flow-based motion prior for blind image deblurring. In *Proc. CVPR*, 2023. 1, 2, 5, 6, 7, 8
- [4] Xiangtao Kong, Hengyuan Zhao, Yu Qiao, and Chao Dong. Classsr: A general framework to accelerate super-resolution networks by data characteristic. In *Proc. CVPR*, 2021. 1
- [5] Xintian Mao, Yiming Liu, Fengze Liu, Qingli Li, Wei Shen, and Yan Wang. Intriguing findings of frequency selection for image deblurring. In *Proc. AAAI*, 2023. 2, 5, 6, 7, 8
- [6] Seungjun Nah, Tae Hyun Kim, and Kyoung Mu Lee. Deep multi-scale convolutional neural network for dynamic scene deblurring. In *Proc. CVPR*, 2017. 1, 2
- [7] Jaesung Rim, Haeyun Lee, Jucheol Won, and Sunghyun Cho. Real-world blur dataset for learning and benchmarking deblurring algorithms. In *Proc. ECCV*, 2020. 1, 2, 3
- [8] Ziyi Shen, Wenguan Wang, Xiankai Lu, Jianbing Shen, Haibin Ling, Tingfa Xu, and Ling Shao. Human-aware motion deblurring. In *Proc. ICCV*, 2019. 1, 2
- [9] Fu-Jen Tsai, Yan-Tsung Peng, Yen-Yu Lin, Chung-Chi Tsai, and Chia-Wen Lin. Stripformer: Strip transformer for fast image deblurring. In *ECCV*, 2022. 7, 8
- [10] Syed Waqas Zamir, Aditya Arora, Salman H. Khan, Munawar Hayat, Fahad Shahbaz Khan, and Ming-Hsuan Yang. Restormer: Efficient transformer for high-resolution image restoration. In *Proc. CVPR*, 2022. 2
